# Supplementary material
Source: bioRxiv or medRxiv preprint supplement (https://www.biorxiv.org/highwire/filestream/22258/field_highwire_adjunct_files/0/080572-1.pdf)
Supplement: Supplementary file [file 080572-1.pdf]

## Supplemental Information

Functional analysis of a biosynthetic cluster essential for production of 4-formylaminoxyvinylglycine, a germination-arrest factor from *Pseudomonas fluorescens* WH6

Rachel A. Okrent, Kristin M. Trippe, Maciej Maselko and Viola Manning

## Table of Contents:

### Supplemental figures:

|                                                                         |   |
|-------------------------------------------------------------------------|---|
| S1 Variations in start sites of sequences compared to genome annotation | 1 |
| S2 Confirmation that pJW5251 complements the $\Delta gvgC$ mutation     | 2 |
| S3 Mapping of transcript start sites by 5' RACE analysis                | 3 |
| S4 Qualitative analysis of <i>lacZ</i> promoter fusions                 | 4 |

### Supplemental tables:

|                                                                                                            |    |
|------------------------------------------------------------------------------------------------------------|----|
| S1 Bacterial strains used in this study                                                                    | 5  |
| S2 Bacterial plasmids used in this study                                                                   | 6  |
| S3 Primers used in this study                                                                              | 8  |
| S4 Primers for overlap extension PCR                                                                       | 13 |
| S5 Primers for amplification of the FRT- <i>kan</i> -FRT fragment                                          | 14 |
| S6 Primers for confirmation of deletion mutants                                                            | 15 |
| S7 Primers used to make constructs for complementation or <i>lacZ</i> reporter fusions                     | 16 |
| S8 Primers used in RT-PCR for transcript identification                                                    | 17 |
| S9 Reverse primers for 5' RACE analysis                                                                    | 18 |
| S10 Germination arrest activity from filtrates of mutant strains of <i>P. fluorescens</i> WH6              | 19 |
| S11 Germination arrest activity from filtrates of complemented mutant strains of <i>P. fluorescens</i> WH6 | 20 |

|                   |           |
|-------------------|-----------|
| <b>References</b> | <b>21</b> |
|-------------------|-----------|

(a)

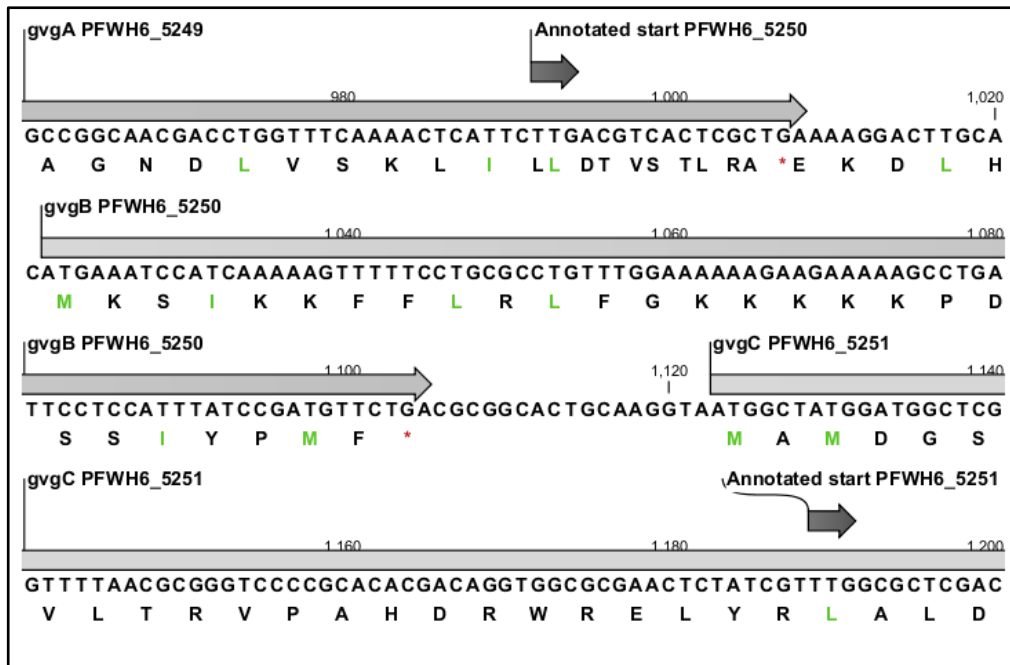

(b)

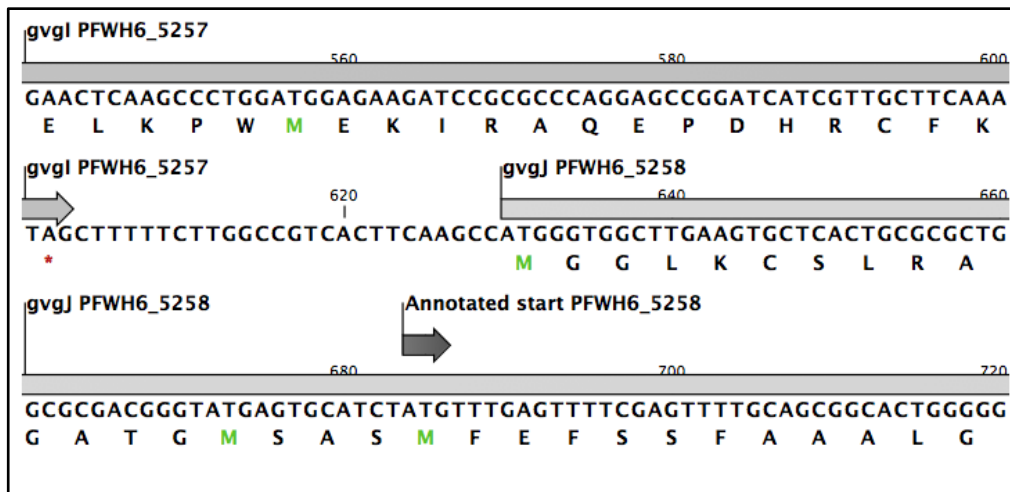

**Fig. S1.** Diagram of sequence discrepancies between annotated ORFs in the *Pseudomonas fluorescens* WH6 genome (NCBI CM001025, start sites indicated with dark gray arrows) and ORFs utilized for constructing deletion mutations and plasmids for complements (light gray arrows). The translations are shown under the gene diagrams. (a) Comparison of annotated start sites and utilized start sites for *gvgB* and *gvgC*. In the translation for the overlapping region between *gvgA* and the annotated *gvgB*, the first letter is the translation for *gvgA* and the second for *gvgB*. (b) Comparison of annotated start site and the start site used for constructing deletions mutations and complements of *gvgJ*.

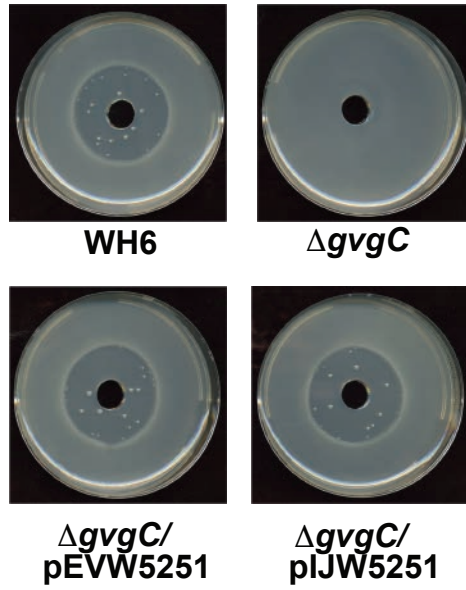

**Fig. S2.** Confirmation that pIJW5251 (*gvgC* under an Ara-inducible promoter) complements the  $\Delta gvgC$  mutation. Strains tested in the agar diffusion assays for anti-*Erwinia* activity were wild-type WH6, WH6-25G ( $\Delta gvgC$ ), WH6-25G/ pEVW5251, and WH6-25G/ pIJW5251.

(a)

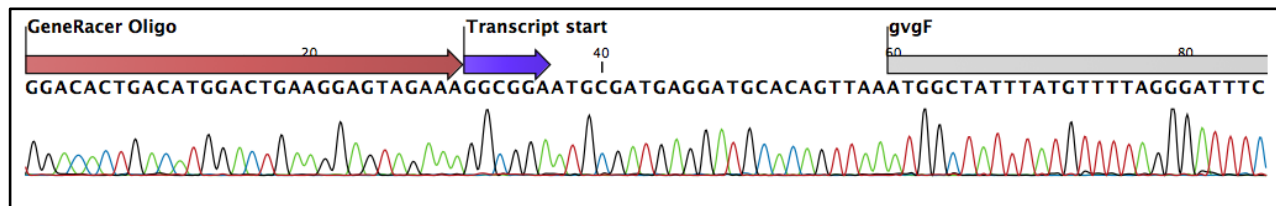

(b)

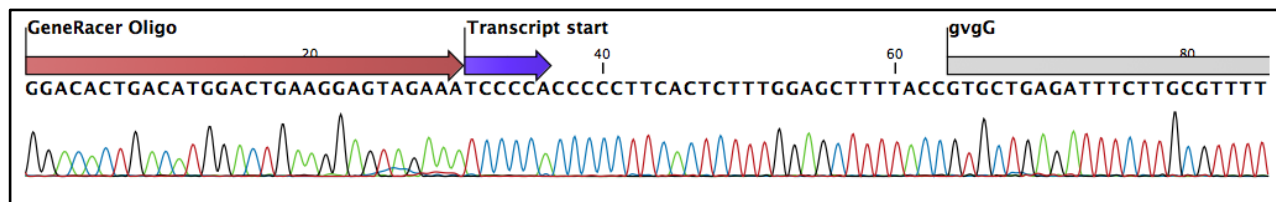

**Fig. S3.** Transcriptional start sites determined from longest sequenced transcripts from 5' RACE analysis for (a) *gvgF*, with reverse primer within *gvgF* and (b) *gvgG-H*, with reverse primer within *gvgH*.

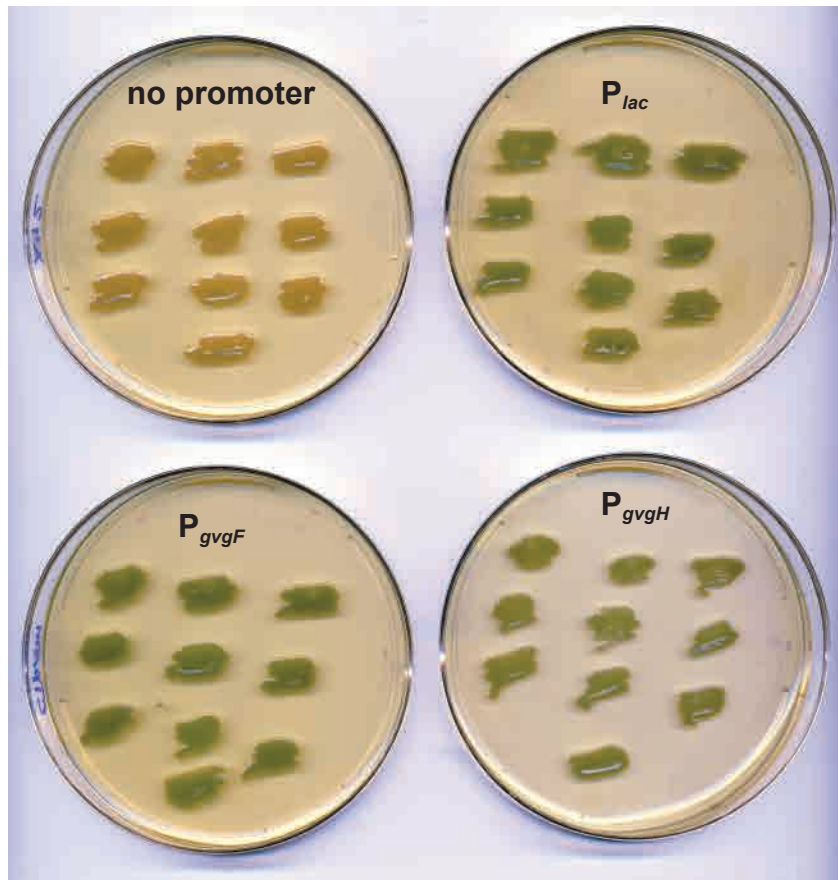

**Fig. S4.**  $\beta$ -galactosidase activity was qualitatively assessed on LB agar supplemented with X-gal for *lacZ* promoter fusions  $P_{lac}$ -*lacZ*,  $P_{gvgF}$ -*lacZ* and  $P_{gvgH}$ -*lacZ* along with a promoter-less *lacZ* negative control in the *P. fluorescens* WH6 background. Ten clones were tested from each transformation of *P. fluorescens* WH6.

**Table S1.** Bacterial strains used in this study

| Strains                              | Relevant Characteristics                                                                                                                          | Reference                      |
|--------------------------------------|---------------------------------------------------------------------------------------------------------------------------------------------------|--------------------------------|
| <i>Pseudomonas fluorescens</i>       |                                                                                                                                                   |                                |
| WH6                                  | Wild type; from <i>Triticum aestivum</i> L. roots; Ap <sup>r</sup>                                                                                | (Elliott <i>et al.</i> , 1998) |
| WH6-21G                              | $\Delta gvgR$ ; PFWH6_5248 deleted (lacking nt 1 – 1455); Ap <sup>r</sup>                                                                         | This study                     |
| WH6-22G                              | $\Delta tam$ ; PFWH6_5247 deleted (lacking nt 1 – 762); Ap <sup>r</sup>                                                                           | This study                     |
| WH6-23G                              | $\Delta gvgA$ ; PFWH6_5249 deleted (lacking nt 1 – 1008); Ap <sup>r</sup>                                                                         | This study                     |
| WH6-24G                              | $\Delta gvgB$ ; PFWH6_5250 deleted (lacking nt 4 – 82); Ap <sup>r</sup>                                                                           | This study                     |
| WH6-25G                              | $\Delta gvgC$ ; PFWH6_5251 deleted (lacking nt 1 – 2211); Ap <sup>r</sup>                                                                         | This study                     |
| WH6-26G                              | $\Delta gvgD$ ; PFWH6_5252 deleted (lacking nt 4 – 1041); Ap <sup>r</sup>                                                                         | This study                     |
| WH6-27G                              | $\Delta gvgE$ ; PFWH6_5253 deleted (lacking nt 4 – 615); Ap <sup>r</sup>                                                                          | This study                     |
| WH6-28G                              | $\Delta gvgF$ ; PFWH6_5254 deleted (lacking nt 4 – 1833); Ap <sup>r</sup>                                                                         | This study                     |
| WH6-29G                              | $\Delta gvgG$ ; PFWH6_5255 deleted (lacking nt 6 – 135); Ap <sup>r</sup>                                                                          | This study                     |
| WH6-30G                              | $\Delta gvgH$ ; PFWH6_5256 deleted (lacking nt 4 – 1317); Ap <sup>r</sup>                                                                         | This study                     |
| WH6-31G                              | $\Delta gvgI$ ; PFWH6_5257 deleted (lacking nt 4 – 594); Ap <sup>r</sup>                                                                          | This study                     |
| WH6-32G                              | $\Delta gvgJ$ ; PFWH6_5258 and 51 additional nt upstream deleted; Ap <sup>r</sup>                                                                 | This study                     |
| WH6-33G                              | $\Delta gvgK$ ; PFWH6_5259 deleted (lacking nt 4 – 609); Ap <sup>r</sup>                                                                          | This study                     |
| WH6-34G                              | $\Delta gvgCJK$ ; PFWH6_5251, PFWH6_5258 and PFWH6_5259 deleted; Ap <sup>r</sup>                                                                  | This study                     |
| <i>Escherichia coli</i> DH5 $\alpha$ | F <sup>-</sup> <i>recA1 endA1 hsdR17 supE44 thi-1 gyrA96 relA1</i> $\Delta(arg-lacZYA)1169$ ( $\Phi 80lacZ \Delta M15$ )                          | Life Technologies              |
| <i>Erwinia amylovora</i> 153         | Wild type; originally isolated from a fire blight canker on Gala apple in Eastern Oregon (Obtained from Dr. Joyce Loper, USDA-ARS, Corvallis, OR) | (Halgren <i>et al.</i> , 2011) |

**Table S2.** Bacterial plasmids used in this study

| Plasmid         | Relevant Characteristics                                                                                                                       | Source                        |
|-----------------|------------------------------------------------------------------------------------------------------------------------------------------------|-------------------------------|
| pEX-18Tc        | Mob <sup>+</sup> <i>sacB</i> gene replacement vector; Tc <sup>r</sup>                                                                          | (Hoang <i>et al.</i> , 1998)  |
| pEX-18Km        | Modified version of pEX-18Tc with <i>tet</i> replaced by <i>kan</i> from pKD13; Km <sup>r</sup>                                                | This study                    |
| pRK2013         | Mob <sup>+</sup> RK2 <i>tra</i> ColE1 plasmid; Km <sup>r</sup>                                                                                 | (Figurski & Helinski, 1979)   |
| pBH474          | Suc <sup>s</sup> derivative of pTH474 with <i>flp</i> expressed constitutively; Gm <sup>r</sup>                                                | (House <i>et al.</i> , 2004)  |
| pKD13           | Source of FRT- <i>kan</i> -FRT for pJET-KanR-FRT plasmid and <i>kan</i> for pEX-18Km plasmid; Km <sup>r</sup>                                  | (Datsenko & Wanner, 2000)     |
| pJet1.2/blunt™  | Cloning vector for PCR products; Ap <sup>r</sup>                                                                                               | Life Technologies             |
| pCR4Blunt-TOPO™ | Cloning vector for PCR products; Ap <sup>r</sup> , Km <sup>r</sup>                                                                             | Life Technologies             |
| pJET-KanR-FRT   | Plasmid with FRT- <i>kan</i> -FRT sequence from pKD13 flanked by BamHI and XhoI sites; Ap <sup>r</sup> ; Km <sup>r</sup>                       | (Okrent <i>et al.</i> , 2014) |
| pBBR1MCS-5      | Broad host range cloning vector for use in complementation; Gm <sup>r</sup>                                                                    | (Kovach <i>et al.</i> , 1995) |
| pBBR1EVM        | Derivative of the pBBR1MCS-5 cloning vector for constitutive expression; Gm <sup>r</sup> .                                                     | (Okrent <i>et al.</i> , 2014) |
| pJN105          | Derivative of the pBBR1MCS-5 cloning vector for inducible expression using L-arabinose ( <i>araC</i> -P <sub>BAD</sub> ); Gm <sup>r</sup>      | (Newman & Fuqua, 1999)        |
| pXY2            | Mini-Tn7 vector for constructing translational fusions with <i>lacZ</i> , inserts region of interest at conserved attTn7 site; Gm <sup>r</sup> | (Liu <i>et al.</i> , 2014)    |
| pTNS3           | Helper plasmid for insertion of Mini-Tn7 containing <i>tnsABCD</i> ; Ap <sup>r</sup>                                                           | (Choi <i>et al.</i> , 2008)   |
| pEXW21          | pEX-18Km- $\Delta$ <i>gvgR</i> ; Km <sup>r</sup>                                                                                               | This study                    |
| pEXW22          | pEX-18Km- $\Delta$ <i>tam</i> ; Km <sup>r</sup>                                                                                                | This study                    |
| pEXW23          | pEX-18Km- $\Delta$ <i>gvgA</i> ; Km <sup>r</sup>                                                                                               | This study                    |
| pEXW24          | pEX-18Tc- $\Delta$ <i>gvgB</i> ; Tc <sup>r</sup> , Km <sup>r</sup>                                                                             | This study                    |
| pEXW25          | pEX-18Km- $\Delta$ <i>gvgC</i> ; Km <sup>r</sup>                                                                                               | This study                    |
| pEXW26          | pEX-18Tc- $\Delta$ <i>gvgD</i> ; Tc <sup>r</sup> , Km <sup>r</sup>                                                                             | This study                    |
| pEXW27          | pEX-18Tc- $\Delta$ <i>gvgE</i> ; Tc <sup>r</sup> , Km <sup>r</sup>                                                                             | This study                    |
| pEXW28          | pEX-18Tc- $\Delta$ <i>gvgF</i> ; Tc <sup>r</sup> , Km <sup>r</sup>                                                                             | This study                    |
| pEXW29          | pEX-18Tc- $\Delta$ <i>gvgG</i> ; Tc <sup>r</sup> , Km <sup>r</sup>                                                                             | This study                    |
| pEXW30          | pEX-18Tc- $\Delta$ <i>gvgH</i> ; Tc <sup>r</sup> , Km <sup>r</sup>                                                                             | This study                    |
| pEXW31          | pEX-18Tc- $\Delta$ <i>gvgI</i> ; Tc <sup>r</sup> , Km <sup>r</sup>                                                                             | This study                    |
| pEXW32          | pEX-18Tc- $\Delta$ <i>gvgJ</i> ; Tc <sup>r</sup> , Km <sup>r</sup>                                                                             | This study                    |
| pEXW33          | pEX-18Tc- $\Delta$ <i>gvgK</i> ; Tc <sup>r</sup> , Km <sup>r</sup>                                                                             | This study                    |
| pEXW34          | pEX-18Tc- $\Delta$ ( <i>gvgJ-gvgK</i> ); Tc <sup>r</sup> , Km <sup>r</sup>                                                                     | This study                    |



|            |                                                                                                                                                                           |            |
|------------|---------------------------------------------------------------------------------------------------------------------------------------------------------------------------|------------|
| pEVW5248   | pBBR1EVM with <i>gvgR</i> flanked by XhoI and BamHI sites; Gm <sup>r</sup>                                                                                                | This study |
| pNBW5248N2 | pBBR1MCS-5 with <i>gvgR</i> , <i>gvgA</i> and the intergenic region between (containing putative native promoters for both genes) flanked by BamHI sites; Gm <sup>r</sup> | This study |
| pEVW5249   | pBBR1EVM with <i>gvgA</i> flanked by XhoI and BamHI sites; Gm <sup>r</sup>                                                                                                | This study |
| pEVW5249N2 | pBBR1EVM with <i>gvgA-gvgB</i> flanked by XhoI and BamHI sites; Gm <sup>r</sup>                                                                                           | This study |
| pEVW5250   | pBBR1EVM with <i>gvgB</i> flanked by XhoI and BamHI sites; Gm <sup>r</sup>                                                                                                | This study |
| pEVW5251   | pBBR1EVM with <i>gvgC</i> flanked by XhoI and BamHI sites; Gm <sup>r</sup>                                                                                                | This study |
| pIJW5251   | pJN105 with <i>gvgC</i> flanked by EcoRI and XbaI sites; Gm <sup>r</sup>                                                                                                  | This study |
| pEVW5254   | pBBR1EVM with <i>gvgF</i> flanked by XhoI and SacI sites; Gm <sup>r</sup>                                                                                                 | This study |
| pEVW5255   | pBBR1EVM with <i>gvgG</i> flanked by XhoI and SacI sites; Gm <sup>r</sup>                                                                                                 | This study |
| pEVW5256   | pBBR1EVM with <i>gvgH</i> flanked by XhoI and BamHI sites; Gm <sup>r</sup>                                                                                                | This study |
| pEVW5257   | pBBR1EVM with <i>gvgI</i> flanked by XhoI and BamHI sites; Gm <sup>r</sup>                                                                                                | This study |
| pEVW5258   | pBBR1EVM with <i>gvgJ</i> flanked by XhoI and BamHI sites; Gm <sup>r</sup>                                                                                                | This study |
| pEVW5259   | pBBR1EVM with <i>gvgK</i> flanked by XhoI and SacI sites; Gm <sup>r</sup>                                                                                                 | This study |
| pNZWp5254  | pXY2 with putative promoter of <i>gvgF</i> flanked by SpeI and HindIII sites; Gm <sup>r</sup>                                                                             | This study |
| pNZWp5256  | pXY2 with putative promoter of <i>gvgH</i> flanked by SpeI and HindIII sites; Gm <sup>r</sup>                                                                             | This study |
| pXY2-plac  | pXY2 with lac promoter flanked by SpeI and HindIII sites; Gm <sup>r</sup>                                                                                                 | This study |

**Table S3.** Primers\* used in this study

| Primer ID | Primer sequence (5' to 3')                         |
|-----------|----------------------------------------------------|
| AH024     | GCAGTTTCAAGGAGCACACC                               |
| AH100     | CAGAACCCAGGGGCTTGCCTT                              |
| AH103     | CCAGCACAACGACCCGGAATCA                             |
| AH106     | ACTTTTCAGGCAAGCCGCGTTCG                            |
| AH107     | CCTCCGAGCCGCCGATAAAAAC                             |
| AH108     | CCACCGCTGGCAAACGAGGAAAT                            |
| AH109     | CCTGCAGGTCAGCCAGGGTGATG                            |
| AH137     | GTTTTTATCCGGCGGCTCGGAGG                            |
| KT12      | TTACGGGTTGGATCCCTCGAGCACGGTAAAAGCTCCAAAGAGTGAAGG   |
| KT13      | GCTTTTACCGTGCTCGAGGGATCCAACCCGTAA GGCCAATCGCCCAAGG |
| KT14      | gctataGAATTCGGTCGCTGATCAACAGTGCC                   |
| KT18      | gctataAAGCTTTGGCGATGAAGAAATCG                      |
| lacZ6     | CTTTCCGGCACCGCTTCTGG                               |
| M13F      | GTAAAACGACGGCCAGT                                  |
| MM005     | GGATCATCGTTGCTTCAAATAG                             |
| MM006     | GACGAGTCTGCGCTTGCCGT                               |
| MM007     | gatcaGCGGCCGCGAGCTCCATGGATATTTCTGGAAACGG           |
| MM008     | ccatgGAGCTCGCGGCCGCTGATCCCAGGCACGCAGTTGT           |
| MM009     | gccgccAAGCTTGCTGGCGCGACGGGTATGAG                   |
| MM010     | gccgccGAATTCCTTGCCGAGCGCCTCAAGG                    |
| MM011     | TGGCAGGTAAGCGCAAGGC                                |
| MM012     | GGCGCCGATTTGACAGCT                                 |
| MM014     | GCCGATTCGATCTGGGGCG                                |
| MM017     | gccgccCTCGAGTCAAAGTGATTTACAAAATC                   |
| MM018     | aaagccGGATCCCTAGTACGCGACAGCC                       |
| MM019     | CCACGCTTGGGGCGTTGAT                                |
| MM021     | GCCGACGGCTTGGGATCAC                                |
| MM022     | CCTTGTCTTGCATGGCTCGA                               |
| MM023     | gccgccAAGCTTGGGCCGGGTTTTGGCGATGA                   |
| MM024     | gccgccGAGCTCGAAATCACCCCGGCCGCAA                    |
| MM025     | GCTAAAGGATCCCTCGAG CATGCGCGCGGTTCTTGG              |
| MM026     | CATGCTCGAGGGATCCTTTAGCGACAGCGCGGGCTTG              |
| MM027     | TCATCGCCAAAACCCGGCC                                |
| MM028     | GTGCAGCAACGTCAAGCCGC                               |
| MM029     | TACCGGCCACATGGCGCAAG                               |
| MM030     | gccgccAAGCTTGAGCCTGCGCGAGGCCTATT                   |
| MM031     | ggcggcGAATTCCTCGGCGTCCAGGCAGTA                     |
| MM032     | TCCTGCTCAGCGGCCGCGGATCCCATAATTGTTCTCGTGGCGTTAAGG   |
| MM033     | CAATTATGGGATCCGCGGCCGCTGAGCAGGACGTGAGCATGCAG       |
| MM034     | CAGACTTCGCCCTGCGTTTTAAAGGC                         |
| MM035     | CAGGGCGAAGTCTGACTGTAGCTGCTC                        |

MM036 GCGCCAGATATCCAGATGCT  
MM038 ATGTGCGCCATGAATTTACC  
MM039 gccgccCTCGAGACTCTTTATCTGAACCTCGCC  
MM042 ACCCAGCGCAAAGGACTTGCACATGAAATCC  
MM043 CAAGTCCTTTTTCGCTGGGTCCCCTTGG  
MM044 gccgccCTCGAGACGGCAAGGATGACGCTC  
MM045 gccgccGGATCCTCAGCGAGTGACGTCAAGAATG  
MM046 GCATGATGTAGCCCATGGG  
MM047 GGCTCTGGGGCCAGTG  
MM048 TCGCAAGGTACGCCACGAGGAACAATTATG  
MM049 GTGGCGTACCTTGCAGTGCCGCGTC  
MM050 gccgccCTCGAGGCTATGGATGGCTCGGTTT  
MM051 gccgccGGATCCTTAAGGTTTCGTGGGTTTCCA  
MM055 gccgccGGATCCATTCCGGGGATCgGTCGAC  
MM056 gccgccGGATCCGTGTAGGCTGGAGCTGCTTCG  
MM067 gccgccGCGGCCGCGTGTAGGCTGGAGCTGCTTCG  
MM069 gccgccGAGCTCATTCCGGGGATCgGTCGAC  
MM072 AGCCCGAAAGCCCGATCTC  
MM075 gccgccCTCGAGATTCCGGGGATCgGTCGAC  
MM077 CGCTCAAGCAAGAGGCGTTG  
MM079 TGGACGATATCGGCGCTTTG  
MM080 TGAAGTTGCCGAGCTGGTCG  
MM086 ATTGCTGGCCGAGGCAT  
MM087 ACTCCGCATCCAGGAAACATTC  
MM088 gccgccCTCGAGTTGACGTCACTCGCTGAAAAGG  
MM089 gccgccGGATCCTCAGAACATCGGATAAATGGAGGAA  
MM095 ACCGATGCCGGTGAAGTTC  
MM096 CCACCAGCATCAGTGGAAAG  
MM097 gccgccTCTAGACGATCTGTTCTGCAT  
MM098 gccgccGAGCTCCAATGGGCAAGTGATTCCGG  
MM099 CCAAGGCGACGGTGTGTA  
MM100 GCTTGGCGGACCAGGTC  
MM101 gccgccGGATCC CTAAGGCTGGCGTTGTTG  
MM104 gccgcc AAGCTT GGCTTCCAGGTTGATGCCGG  
MM105 gccgcc GAGCTC CGGTCAGCGAGGCGTTATA  
MM106 GTTGGAAGTGGCCAGCGAA  
MM107 CTTGCAGTGCCGCGTCAG  
MM108 ATGACGGCAAGGATGACGCTC  
MM111 gccgccAAGCTTTAACGGCCCGGTACGCCTGT  
MM112 gccgccGAGCTCGACGGACACACAGTGAAAACC  
MM113 CGATGTTCTGACGCGGCAC  
MM114 GGACTGGCAGTTCGTGACG  
MM119 GCGGAACCTCAGGGTGGTGG

MM120 TCCGCATCTTCAGTGAGGCG  
MM123 CGGGTTGACCCACTGGAACAA  
MM124 CTTGTCTTGCATGGCTCG  
MM125 GTGATCGCCACCTGCGTCA  
MM126 TTGACCGCAAATCCAACGC  
MM129 TCAACTCGTATGCTGCAGCAGC  
MM132 gccgccGAGCTCGCGGTTGATCGAGACCTGGGTG  
MM133 gccgccTCTAGAACCTGATTATCACCAGCGGCTGCC  
MM135 aagccgcaCGCCGGTAGCGGTCATACGG  
MM136 ACCGGCGTGCGGCTTTCCTTTAAAACGCAGC  
MM137 GCAGTGACAGCACCAGCCTG  
MM138 CTGCCGGCGTAGCCATTC  
MM139 CCACCCGCAAGGTCGAGATG  
MM140 GTGATCCATGATGCGTGCGC  
pJETF CGACTCACTATAGGGAGAGCGGC  
pJETR AAGAACATCGATTTTCCATGGCAG  
RO7 CACGTCAACCATCCGCTGG  
RO8 TCAAGAACAGGATCCCTGGAGCATGGCTTGAAGTGACGGCCAAG  
RO9 CAAGCCATGCTCGAGGGATCCTGTTCTTGACTCCAACACTACAAGTG  
RO10 ACGGCATCAAGCGTTACACC  
RO11 ACGTAGGTGCCTATTGCCTGC  
RO12 CAACAGCATGGCGTTATTGG  
RO21 acgtacAAGCTTCACGTCAACCATCCGCTGG  
RO25 tcgacGAGCTCACGGCATCAAGCGTTACACC  
RO29 GCTGGTGAGTACCTGCGCAAAGG  
RO68 aaccggAAGCTTGCTACCACGGCAGCACCCCTGG  
RO69 GCTACCACGGCAGCACCCCTGG  
RO70 CAAGAAAAAGCTATTTGAAGGATCCCTCGAGCATCTTCACTTCTCCATTT  
RO71 AGAAGTGAAGATGCTCGAGGGATCCTTCAAATAGCTTTTTCTTGGCCGTCA  
RO72 cacaggGAATTCGCGATGTTCCATGCCAGGTACAGC  
RO73 GCACGGTGTAGAGCACCGGATAGG  
RO74 aatggaCTCGAGCAGACAATCGAGCCAT  
RO75 gtggttGGATCCCTATTTGAAGCAACGATGA  
RO76 aatggaCTCGAGGGTGGCTTGAAGTGC  
RO77 gtggttGGATCCTCAGAACAACGAACTGA  
RO78 ccagcaCTCGAGGCTATTTATGTTTTAGGGATTT  
RO91 aagttgGAGCTCTCAGTCCAGCGGG  
RO92 aaccggAAGCTTCGACTACAGCGAGCACCCACGAC  
RO93 CGACTACAGCGAGCACCCACGAC  
RO94 CTCTGCGTTTCAAGACCAGGATCCCTCGAGCATGCTCACGTCCCTGCTCAA  
RO95 GACGTGAGCATGCTCGAGGGATCCTGGTCTTGAAACGCAGAGAAAGGTT  
RO96 cacaggGAATTCAGTTCAACGCCACGCCACC  
RO97 CAGTTCAACGCCACGCCACC

RO98 TCAACGACCAGCAGGTCC  
 RO99 CCGCACTGTCGTGATAGAAGG  
 RO102 GTTGGATTTTGCGGTCAA  
 RO103 CGATGACTTGTTGCACTT  
 RO106 GAAATGGACGTGCTGGTTCT  
 RO107 CAGGTGTCGAGGTAGCGTTT  
 RO108 CACGAACCTTAACGCCAC  
 RO109 ACTGGGCGATTTCTTCAT  
 RO116 ccagcaCTCGAGGTGCTGAGATTTCTTGC  
 RO117 aagttgGAGCTCTTACGGGTTACTTACGGA  
 RO121 aagttgGAGCTCTCAACTCGTATGCTGC  
 RO124 aagttgCTCGAGCGCAGCTTTTCAGTA  
 RO141 aatggaCTCGAGTCCTTGTGCTTTGATTTA  
 RO156 aaccggAAGCTTGAAGTGGGACATCATCTGG  
 RO157 GAACTGGGACATCATCTGG  
 RO158 GGTGGGGATCAGTCCAGGGATCCCTCGAGCATTAACTGTGCATCCT  
 RO159 CACAGTTAAATGCTCGAGGGATCCCTGGACTGATCCCCACC  
 RO160 cacaggGAATTCATCGAGGATCAGCAGCA  
 RO161 ATCGAGGATCAGCAGCA  
 RO165 ATCGATTGGCACAGGCA  
 RO166 AACGGGACGAATGAAACACC  
 RO167 TGTACCTGTTGTTTCTGGC  
 RO171 ACGCACCTGGACACTAC  
 RO173 CATAGGCGAACAGCTGC  
 RO213 gtagcTACTAGTCTTGCAGGTGATCGG  
 RO215 gtagttACTAGTGAAGATCAAATACCGCGAGTCG  
 RO217 gtcgttACTAGTCCCAGGCTTTACACTTTATGC  
 T7 TAATACGACTCACTATAGGG  
 VM001 TGCCCTGGGATCAGCGGCCGCGAGCTCCATGGCTTGAAGTGACGGCCA  
 VM002 CTTCAAGCCATGGAGCTCGCGGCCGCTGATCCCAGGCACGCAGTT  
 VM005 CCTGCTATCTGTTTTTCT  
 VM006 TTTACCTTCGGTGTCTTCT  
 VM007 gccgccTCTAGAGACGAGTCTGCGCTTGCCGT  
 VM008 GCGGTTTGTGCGTTGTGTTCTG  
 VM010 TAACAAAGCAGCACAGTACGC  
 VM011 TGCAGTGCCGCGTCAGGATCCCTCGAGCATGTGCAAGTCCTTTTC  
 VM012 AAGGACTTGACATGCTCGAGGGATCCCTGACGCGGCACTGCAAGG  
 VM013 TCACTGAAGATGCGGAACA  
 VM014 acgtacAAGCTTTAACAAGCAGCACAGTACGCACC  
 VM015 gccgccGAATTC TCACTGAAGATGCGGAACA  
 VM019 AGCCATGGAGCTCGCGGCCGATTCCGGGGATCGGTCTGA  
 VM020 GTGCCTGGGATCAGCGGCCGAGTGTAGGCTGGAGCTGCTTC

VM027 CATTATCCTGCAACCCTT  
VM029 TTGACAAAGGGAATCAGG  
VM036 caggacGAATTCATGGCTATGGATGGCTCG  
VM037 gtcctgTCTAGATTAAGGTTCGTGGGTTTCC  
VM047 gtcaccAAGCTTGTGATAGAAGGCAGAAATCCC  
VM049 acAAGCTTCGGCGAGGTGTTGAGATTTT

\* The purposes of these primers are described in Tables S4–S9. Underlined nucleotides indicate restriction recognition sites and nucleotides in lowercase indicate nucleotides added for efficient cleavage by restriction enzymes.

**Table S4.** Primers\* for overlap extension PCR to construct deletions and restriction sites for cloning PCR fragments into pEX18-Km or pEX18-Tc vectors

| Deletion Construct | Gene(s)      | Backbone (pEX18-) | 5' 1° PCR    | 3' 1° PCR    | 2° PCR       | Restriction sites† |
|--------------------|--------------|-------------------|--------------|--------------|--------------|--------------------|
| pEXW21G            | <i>vggR</i>  | Km                | MM097/ MM035 | MM034/ MM098 | MM097/ MM098 | X/S                |
| pEXW22G            | <i>tam</i>   | Km                | MM133/ MM136 | MM135/ MM132 | MM133/ MM132 | X/S                |
| pEXW23G            | <i>vggA</i>  | Km                | MM104/ MM43  | MM042/ MM105 | MM104/ MM105 | H/S                |
| pEXW24G            | <i>vggB</i>  | Tc                | VM010/ VM011 | VM012/ VM013 | VM014/ VM015 | H/E                |
| pEXW25G            | <i>vggC</i>  | Km                | MM111/ MM049 | MM048/ MM112 | MM111/ MM112 | H/S                |
| pEXW26G            | <i>vggD</i>  | Tc                | MM030/ MM032 | MM033/ MM031 | MM030/ MM031 | H/E                |
| pEXW27G            | <i>vggE</i>  | Tc                | RO93/ RO94   | RO95/ RO97   | RO92/ RO96   | H/E                |
| pEXW28G            | <i>vggF</i>  | Tc                | RO157/ RO158 | RO159/ RO161 | RO156/ RO160 | H/E                |
| pEXW29G            | <i>vggG</i>  | Tc                | KT18/ KT12   | KT13/ KT14   | KT18/ KT14   | H/E                |
| pEXW30G            | <i>vggH</i>  | Tc                | MM023/ MM025 | MM026/ MM024 | MM023/ MM024 | H/S                |
| pEXW31G            | <i>vggI</i>  | Tc                | RO69/ RO70   | RO71/ RO73   | RO68/ RO72   | H/E                |
| pEXW32G            | <i>vggJ</i>  | Tc                | RO7/ RO8     | RO9/ RO10    | RO21/ RO25   | H/E                |
| pEXW33G            | <i>vggK</i>  | Tc                | MM005/ MM007 | MM008/ MM006 | MM009/ MM010 | H/E                |
| pEXW34G            | <i>vggJK</i> | Tc                | RO7/ VM001   | VM002/ MM006 | RO21/ VM007  | H/X                |

\* Primer sequences are listed in Table S3.

† E = EcoRI, H = HindIII, S = SacI, X = XbaI

**Table S5.** Primers\* for amplification of the FRT-*kan*-FRT fragment for cloning into the deletion constructs

| <b>Deletion construct</b> | <b>Gene(s)</b> | <b><i>kan</i> inserted?</b> | <b>Sites</b>  | <b>Primers</b> |
|---------------------------|----------------|-----------------------------|---------------|----------------|
| pEXW21                    | <i>gvgR</i>    | N                           | N/A           | N/A            |
| pEXW22                    | <i>tam</i>     | N                           | N/A           | N/A            |
| pEXW23                    | <i>gvgA</i>    | N                           | N/A           | N/A            |
| pEXW24                    | <i>gvgB</i>    | Y                           | XhoI/ BamHI   | digest†        |
| pEXW25                    | <i>gvgC</i>    | N                           | N/A           | N/A            |
| pEXW26                    | <i>gvgD</i>    | Y                           | BamHI/ NotI   | MM055/ MM067   |
| pEXW27                    | <i>gvgE</i>    | Y                           | XhoI/ BamHI   | digest         |
| pEXW28                    | <i>gvgF</i>    | Y                           | XhoI/ BamHI   | digest         |
| pEXW29                    | <i>gvgG</i>    | Y                           | XhoI/ BamHI   | digest         |
| pEXW30                    | <i>gvgH</i>    | Y                           | XhoI/BamHI    | MM075/ MM056   |
| pEXW31                    | <i>gvgI</i>    | Y                           | XhoI/ BamHI   | digest         |
| pEXW32                    | <i>gvgJ</i>    | Y                           | XhoI/ BamHI   | digest         |
| pEXW33                    | <i>gvgK</i>    | Y                           | SacI/ NotI    | MM069/ MM067   |
| pEXW34                    | <i>gvgJK</i>   | Y                           | HiFi Assembly | VM019/ VM020   |

\*Primer sequences are listed in Table S3.

†“Digest” indicates the FRT-*kan*-FRT fragment was excised from the pJET-KanR-FRT plasmid.



**Table S6.** Primers\* used for confirmation of deletion mutants

| <b>Strain</b> | <b>Mutation</b> | <b>Distinguish†</b> | <b>Amplification‡</b> | <b>Sequencing§</b>              |
|---------------|-----------------|---------------------|-----------------------|---------------------------------|
| WH6-21G       | <i>ΔgvgR</i>    | MM099/ MM100        | MM036/ MM038          | T7, MM099                       |
| WH6-22G       | <i>tam</i>      | MM139/MM140         | MM137/MM138           | MM139                           |
| WH6-23G       | <i>ΔgvgA</i>    | MM106/ MM107        | MM046/ MM047          | T7, MM106                       |
| WH6-24G       | <i>ΔgvgB</i>    | MM086/MM087         | MM079/ MM119          | pJETF, VM010, VM027, pJETR      |
| WH6-25G       | <i>ΔgvgC</i>    | MM113/ MM114        | MM095/ MM096          | T7, MM114                       |
| WH6-26G       | <i>ΔgvgD</i>    | MM028/ MM029        | MM028/ MM027          | T7, pJETR                       |
| WH6-27G       | <i>ΔgvgE</i>    | RO98/ RO99          | RO108/ RO109          | pJETF, RO98, RO99, pJETR        |
| WH6-28G       | <i>ΔgvgF</i>    | RO165/ RO166        | RO171/ RO173          | pJETF, RO167, pJETR             |
| WH6-29G       | <i>ΔgvgG</i>    | RO106/ RO107        | RO102/ RO103          | pJETF, AH024, pJETR             |
| WH6-30G       | <i>ΔgvgH</i>    | MM021/ MM022        | MM021/ MM019          | T7, pJETR                       |
| WH6-31G       | <i>ΔgvgI</i>    | RO7/ AH103          | AH137/ AH100          | pJETF, RO7, pJETR               |
| WH6-32G       | <i>ΔgvgJ</i>    | RO11/ RO12          | AH106/ RO29           | pJETF, RO7, RO12, pJETR         |
| WH6-33G       | <i>ΔgvgK</i>    | MM011/ MM012        | MM011/ MM014          | T7, pJETR                       |
| WH6-34G       | <i>ΔgvgJK</i>   | VM005/ VM006        | VM008/ AH106          | pJETF, pJETR, RO7, RO124, MM012 |

\* Primer sequences are listed in Table S3.

† Distinguish: Primer set used to distinguish between wild-type and mutant copies of an allele.

‡ Amplification: Primer set used to amplify the region flanking the deletion prior to sequencing.

§ Sequencing: Primers used in sequencing reaction to confirm deletion genotype.

**Table S7.** Primers\* used to make constructs for complementation or *lacZ* reporter studies

| <b>Gene(s)</b>           | <b>Backbone</b> | <b>Construct</b> | <b>Digestion</b> | <b>Primer Pair</b> |
|--------------------------|-----------------|------------------|------------------|--------------------|
| <i>vggR</i>              | pBBR1EVM        | pEVW5248         | XhoI/ BamHI      | MM039/ MM101       |
| <i>vggR-vggA</i>         | pBBR1MCS5       | pNBW5248N2       | BamHI/ BamHI     | MM101/ MM045       |
| <i>vggA</i>              | pBBR1EVM        | pEVW5249         | XhoI/ BamHI      | MM044/ MM045       |
| <i>vggA-vggB</i>         | pBBR1EVM        | pEVW5249N2       | XhoI/ BamHI      | MM044/ MM089       |
| <i>vggB</i>              | pBBR1EVM        | pEVW5250         | XhoI/ BamHI      | MM088/ MM089       |
| <i>vggC</i>              | pBBR1EVM        | pEVW5251         | XhoI/ BamHI      | MM050/ MM051       |
| <i>vggC</i>              | pJN105          | pIJW5251         | EcoRI/ XbaI      | VM036/ VM037       |
| <i>vggF</i>              | pBBR1EVM        | pEVW5254         | XhoI/ SacI       | RO78/ RO91         |
| <i>vggG</i>              | pBBR1EVM        | pEVW5255         | XhoI/ SacI       | RO116/ RO117       |
| <i>vggH</i>              | pBBR1EVM        | pEVW5256         | XhoI/ BamHI      | MM017/ MM018       |
| <i>vggI</i>              | pBBR1EVM        | pEVW5257         | XhoI/ BamHI      | RO74/ RO75         |
| <i>vggJ</i>              | pBBR1EVM        | pEVW5258         | XhoI/ BamHI      | RO76/ RO77         |
| <i>vggK</i>              | pBBR1EVM        | pEVW5259         | XhoI/ SacI       | RO141/ RO121       |
| P <sub><i>vggF</i></sub> | pXY2            | pNZWp5254        | SpeI/ HindIII    | RO213/ VM047       |
| P <sub><i>vggH</i></sub> | pXY2            | pNZWp5256        | SpeI/ HindIII    | RO215/ VM049       |
| P <sub><i>lac</i></sub>  | pXY2            | pXY2-plac        | SpeI/ HindIII    | RO217/ M13F        |

\* Primer sequences are listed in Table S3.

**Table S8.** Primers\* used in RT-PCR for transcript identification

| <b>Fragment</b> | <b>Primer Pair</b> | <b>Length (kb)</b> |
|-----------------|--------------------|--------------------|
| 1               | MM079/ MM080       | 1.4                |
| 2               | MM108/ MM119       | 2.4                |
| 3               | MM120/ MM123       | 2.6                |
| 4               | MM125/ MM126       | 1.7                |
| 5               | MM072/ MM124       | 2.7                |
| 6               | MM077/ MM129       | 2.3                |

\* Primer sequences are listed in Table S3.

**Table S9.** Reverse primers\* for 5' RACE analysis

| <b>Gene</b>        | <b>Primer</b> |
|--------------------|---------------|
| <i>gvgF</i>        | AH108         |
| <i>gvgF</i> nested | AH109         |
| <i>gvgH</i>        | AH106         |
| <i>gvgH</i> nested | AH107         |

\* Primer sequences are listed in Table S3.

**Table S10.** Germination arrest activity of filtrates from mutant strains of *P. fluorescens* WH6\*

| <b>Strain</b> | <b>Genotype</b> | <b>0.03X</b> | <b>0.1X</b> | <b>0.3X</b> | <b>1.0X</b> |
|---------------|-----------------|--------------|-------------|-------------|-------------|
| WT            | WT              | 1.8 ± 0.09   | 1.1 ± 0.07  | 1.0 ± 0.00  | 1.0 ± 0.00  |
| WH6-21G       | $\Delta gvgR$   | 4.0 ± 0.00   | 4.0 ± 0.00  | 4.0 ± 0.00  | 3.7 ± 0.12  |
| WH6-23G       | $\Delta gvgA$   | 4.0 ± 0.00   | 4.0 ± 0.00  | 4.0 ± 0.00  | 3.5 ± 0.14  |
| WH6-24G       | $\Delta gvgB$   | 4.0 ± 0.00   | 4.0 ± 0.00  | 4.0 ± 0.00  | 3.3 ± 0.09  |
| WH6-25G       | $\Delta gvgC$   | 4.0 ± 0.00   | 4.0 ± 0.00  | 4.0 ± 0.00  | 4.0 ± 0.00  |
| WH6-26G       | $\Delta gvgD$   | 1.8 ± 0.09   | 1.0 ± 0.00  | 1.0 ± 0.00  | 1.0 ± 0.00  |
| WH6-27G       | $\Delta gvgE$   | 1.6 ± 0.07   | 1.1 ± 0.07  | 1.0 ± 0.00  | 1.0 ± 0.00  |
| WH6-28G       | $\Delta gvgF$   | 4.0 ± 0.00   | 4.0 ± 0.00  | 4.0 ± 0.00  | 3.6 ± 0.10  |
| WH6-29G       | $\Delta gvgG$   | 4.0 ± 0.00   | 4.0 ± 0.00  | 4.0 ± 0.00  | 3.1 ± 0.11  |
| WH6-30G       | $\Delta gvgH$   | 4.0 ± 0.00   | 4.0 ± 0.00  | 4.0 ± 0.00  | 4.0 ± 0.00  |
| WH6-31G       | $\Delta gvgI$   | 4.0 ± 0.00   | 3.8 ± 0.12  | 1.3 ± 0.12  | 1.0 ± 0.00  |
| WH6-32G       | $\Delta gvgJ$   | 4.0 ± 0.00   | 4.0 ± 0.00  | 2.8 ± 0.35  | 1.9 ± 0.29  |
| WH6-33G       | $\Delta gvgK$   | 2.1 ± 0.15   | 1.0 ± 0.00  | 1.0 ± 0.00  | 1.0 ± 0.00  |

\* In this semi-quantitative assay, a score of 4.0 indicated normal germination and a score of 1.0 indicates that the germination is arrested. Annual bluegrass seeds were challenged with a dilution series of filtrate of supernatants from bacterial cultures of the indicated *P. fluorescens* WH6 mutant strain. A concentration of 1.0X represents undiluted filtrate. Results are shown as mean values ± SEM.

**Table S11.** Germination arrest activity of filtrates from complemented mutant strains of *P. fluorescens* WH6\*

| <b>Genotype</b> | <b>Strain</b>       | <b>0.03X</b> | <b>0.1X</b> | <b>0.3X</b> | <b>1.0X</b> |
|-----------------|---------------------|--------------|-------------|-------------|-------------|
| WT              | WH6                 | 1.8 ± 0.09   | 1.1 ± 0.07  | 1.0 ± 0.00  | 1.0 ± 0.00  |
| $\Delta gvgR$   | WH6-21G/ pEVW5248   | 4.0 ± 0.00   | 4.0 ± 0.00  | 4.0 ± 0.00  | 3.7 ± 0.17  |
| $\Delta gvgR$   | WH6-21G/ pNBW5248N2 | 2.1 ± 0.06   | 1.2 ± 0.09  | 1.0 ± 0.00  | 1.0 ± 0.00  |
| $\Delta gvgA$   | WH6-23G/ pEVW5249N2 | 3.5 ± 0.17   | 2.2 ± 0.08  | 1.2 ± 0.08  | 1.0 ± 0.00  |
| $\Delta gvgB$   | WH6-24G/ pEVW5250   | 2.4 ± 0.11   | 1.6 ± 0.07  | 1.0 ± 0.00  | 1.0 ± 0.00  |
| $\Delta gvgC$   | WH6-25G/ pEVW5251   | 1.7 ± 0.08   | 1.0 ± 0.00  | 1.0 ± 0.00  | 1.0 ± 0.00  |
| $\Delta gvgF$   | WH6-28G/ pEVW5254   | 2.3 ± 0.09   | 1.5 ± 0.00  | 1.0 ± 0.00  | 1.0 ± 0.00  |
| $\Delta gvgG$   | WH6-29G/ pEVW5255   | 2.6 ± 0.14   | 1.3 ± 0.08  | 1.0 ± 0.00  | 1.0 ± 0.00  |
| $\Delta gvgH$   | WH6-30G/ pEVW5256   | 2.0 ± 0.12   | 1.1 ± 0.07  | 1.0 ± 0.00  | 1.0 ± 0.00  |
| $\Delta gvgI$   | WH6-31G/ pEVW5257   | 1.9 ± 0.11   | 1.0 ± 0.00  | 1.0 ± 0.00  | 1.0 ± 0.00  |
| $\Delta gvgJ$   | WH6-32G/ pEVW5258   | 2.4 ± 0.07   | 1.3 ± 0.09  | 1.0 ± 0.00  | 1.0 ± 0.00  |
| $\Delta gvgK$   | WH6-33G/ pEVW5259   | 2.6 ± 0.07   | 1.9 ± 0.10  | 1.0 ± 0.00  | 1.0 ± 0.00  |

\* In this semi-quantitative assay, a score of 4.0 indicated normal germination and a score of 1.0 indicates that the germination is arrested. Annual bluegrass seeds were challenged with a dilution series of filtrate of supernatants from bacterial cultures of the indicated *P. fluorescens* WH6 complemented mutant strain. A concentration of 1.0X represents undiluted filtrate. Results are shown as mean values ± SEM.

## REFERENCES

- Choi, K.-H., Mima, T., Casart, Y., Rhol, D., Kumar, A., Beacham, I. R. & Schweizer, H. P. (2008).** Genetic tools for select-agent-compliant manipulation of *Burkholderia pseudomallei*. *Appl Environ Microbiol* **74**, 1064-1075.
- Datsenko, K. A. & Wanner, B. L. (2000).** One-step inactivation of chromosomal genes in *Escherichia coli* K-12 using PCR products. *Proc Natl Acad Sci USA* **97**, 6640-6645.
- Elliott, L., Azevedo, M., Mueller-Warrant, G. & Horwath, W. (1998).** Weed control with rhizobacteria. *Soil Sci Agrochem Ecol* **33**, 3-7.
- Figurski, D. H. & Helinski, D. R. (1979).** Replication of an origin-containing derivative of plasmid RK2 dependent on a plasmid function provided in *trans*. *Proc Natl Acad Sci USA* **76**, 1648-1652.
- Halgren, A., Azevedo, M., Mills, D., Armstrong, D., Thimmaiah, M., McPhail, K. & Banowetz, G. (2011).** Selective inhibition of *Erwinia amylovora* by the herbicidally active germination-arrest factor (GAF) produced by *Pseudomonas* bacteria. *J Appl Microbiol* **111**, 949-959.
- Hoang, T. T., Karkhoff-Schweizer, R. R., Kutchma, A. J. & Schweizer, H. P. (1998).** A broad-host-range Flp-FRT recombination system for site-specific excision of chromosomally-located DNA sequences: application for isolation of unmarked *Pseudomonas aeruginosa* mutants. *Gene* **212**, 77-86.
- House, B. L., Mortimer, M. W. & Kahn, M. L. (2004).** New recombination methods for *Sinorhizobium meliloti* genetics. *Appl Environ Microbiol* **70**, 2806-2815.
- Kovach, M. E., Elzer, P. H., Hill, D. S., Robertson, G. T., Farris, M. A., Roop, R. M. & Peterson, K. M. (1995).** Four new derivatives of the broad-host-range cloning vector pBBR1MCS, carrying different antibiotic-resistance cassettes. *Gene* **166**, 175-176.
- Liu, Y., Rainey, P. B. & Zhang, X.-X. (2014).** Mini-Tn7 vectors for studying post-transcriptional gene expression in *Pseudomonas*. *J Microbiol Methods* **107**, 182-185.
- Newman, J. R. & Fuqua, C. (1999).** Broad-host-range expression vectors that carry the L-arabinose-inducible *Escherichia coli* araBAD promoter and the *araC* regulator. *Gene* **227**, 197-203.
- Okrent, R. A., Halgren, A. B., Azevedo, M. D., Chang, J. H., Mills, D. I., Maselko, M., Armstrong, D. J., Banowetz, G. M. & Trippe, K. M. (2014).** Negative regulation of germination-arrest factor production in *Pseudomonas fluorescens* WH6 by a putative extracytoplasmic function sigma factor. *Microbiology* **160**, 2432-2442.
